# Supplementary material for: Type IV Secretion-Dependent Activation of Host MAP Kinases Induces an Increased Proinflammatory Cytokine Response to Legionella pneumophila
Source: PLoS Pathog. 2008 Nov 28;4(11):e1000220. doi: 10.1371/journal.ppat.1000220 (PMC2582680; doi:10.1371/journal.ppat.1000220)
Supplement: Table S5 — Genes that exhibit two-fold or greater Dot/Icm-dependent transcriptional changes in both Myd88 −/− Trif −/− and Myd88 −/− Rip2 −/− macrophages and are shared by the ISD response in Myd88 −/− Trif −/− macrophages. (0.05 MB XLS) [file ppat.1000220.s010.xls]

## Sheet: Sheet1
Gene Title	Gene Symbol	Myd88-/-Trif-/- Lp02 vs Lp03 Signal Log Ratio	Myd88-/-Rip2-/- Lp02 vs Lp03 Signal Log Ratio	Myd88-/-Trif-/- ISD vs no transfection Signal Log Ratio
prostaglandin-endoperoxide synthase 2	Ptgs2	7.2	7.1	5.3
vascular cell adhesion molecule 1	Vcam1	6	1.9	1.5
colony stimulating factor 1 (macrophage)	Csf1	5.3	2.8	3.2
early growth response 1	Egr1	5.1	6.2	1
AT rich interactive domain 5A (Mrf1 like)	Arid5a	5	5.7	5.1
similar to MHC Q8/9d surface antigen	LOC386462	4.9	3.3	2
interleukin 1 beta	Il1b	4.9	2.9	1.2
pleckstrin homology-like domain, family A, member 1	Phlda1	4.8	4.7	1.7
chemokine (C-C motif) ligand 7	Ccl7	4.8	2.8	4.3
tumor necrosis factor, alpha-induced protein 3	Tnfaip3	4.6	4.3	3.6
suppressor of cytokine signaling 3	Socs3	4.6	4	7.3
AXIN1 up-regulated 1	Axud1	4.6	4.9	3.5
BIC noncoding mRNA, complete sequence	---	4.6	4.1	6.3
v-maf musculoaponeurotic fibrosarcoma oncogene family, protein F (avian)	Maff	4.5	4.1	2.1
RIKEN cDNA 4833411O04 gene	4833411O04Rik	4.5	4.4	2.3
matrix metallopeptidase 13	Mmp13	4.1	2.4	4.8
Tnf receptor-associated factor 1	Traf1	3.9	3.7	2
chemokine (C-C motif) ligand 2	Ccl2	3.9	2.1	3.2
ankyrin repeat and BTB (POZ) domain containing 2	Abtb2	3.8	4.8	4.5
SKI-like	Skil	3.7	3.7	2.5
reticuloendotheliosis oncogene	Rel	3.7	4.7	3
Jun-B oncogene	Junb	3.7	4.2	1.5
growth arrest and DNA-damage-inducible 45 beta	Gadd45b	3.7	3	1.3
CD83 antigen	Cd83	3.7	3.6	1.9
heat shock protein 1B	Hspa1b	3.6	3.7	1.8
Down syndrome critical region homolog 1 (human)	Dscr1	3.6	3.5	1.6
CCR4 carbon catabolite repression 4-like (S. cerevisiae)	Ccrn4l	3.6	3.3	3.1
PR domain containing 1, with ZNF domain	Prdm1	3.5	2.6	1.3
myeloid differentiation primary response gene 116	Myd116	3.5	4.2	4.1
chemokine (C-C motif) receptor-like 2	Ccrl2	3.4	3.4	4.2
MOB1, Mps One Binder kinase activator-like 2C (yeast)	Mobkl2c	3.3	1.2	1.6
chemokine (C-X-C motif) ligand 10	Cxcl10	3.3	3.2	6.6
bone morphogenetic protein 2	Bmp2	3.3	3.6	3.1
zinc finger protein 36	Zfp36	3.2	4.1	1.6
SH3-binding domain glutamic acid-rich protein like, mRNA (cDNA clone MGC:35895 IMAGE:4954986)	Sh3bgrl	3.2	2	2.5
RIKEN cDNA C230027N18 gene	C230027N18Rik	3.2	3.3	1.8
human immunodeficiency virus type I enhancer binding protein 2	Hivep2	3.1	3.4	2.5
cholesterol 25-hydroxylase	Ch25h	3	1.6	4.6
RIKEN cDNA 0610037M15 gene	0610037M15Rik	3	3.1	1.4
tumor necrosis factor	Tnf	2.9	3.3	3.4
proviral integration site 1	Pim1	2.9	3.2	2.5
interferon-related developmental regulator 1	Ifrd1	2.9	3.3	1.2
dual specificity phosphatase 16	Dusp16	2.9	2.8	2.2
CAMP responsive element binding protein 5, mRNA (cDNA clone MGC:32277 IMAGE:5012117)	Creb5	2.9	2.1	2.6
mucosa associated lymphoid tissue lymphoma translocation gene 1	Malt1	2.8	2.5	3
Kruppel-like factor 6	Klf6	2.8	3.1	1
poliovirus receptor	Pvr	2.7	1.9	1.4
phosphodiesterase 4B, cAMP specific	Pde4b	2.7	3.3	3.4
regulator of G-protein signaling 1	Rgs1	2.6	1.7	1.4
hypothetical protein C030046G05	C030046G05	2.6	2.8	2.7
RIKEN cDNA 4921515A04 gene	4921515A04Rik	2.6	3	1.8
RIKEN cDNA 3526402J09 gene	3526402J09Rik	2.6	3	1.2
histocompatibility 2, Q region locus 1 /// RIKEN cDNA 0610037M15 gene /// similar to MHC class I histocompatibility antigen H-2 Q4 alpha chain precursor - mouse	H2-Q1 /// 0610037M15Rik /// LOC436493	2.5	2.9	1.1
CD40 antigen	Cd40	2.5	2.1	4.3
RIKEN cDNA 2600010E01 gene	2600010E01Rik	2.5	2.4	2.1
serine/threonine kinase 38 like	Stk38l	2.4	2.6	1
interferon regulatory factor 1	Irf1	2.4	1.3	4
immediate early response 3	Ier3	2.4	3.3	2.7
CD69 antigen	Cd69	2.4	1.9	7.5
nuclear factor of kappa light polypeptide gene enhancer in B-cells inhibitor, zeta	Nfkbiz	2.3	2.7	2.8
intercellular adhesion molecule	Icam1	2.3	1.9	3.1
Kruppel-like factor 6 (Klf6), mRNA	Copeb	2.3	2.4	1
Cbp/p300-interacting transactivator, with Glu/Asp-rich carboxy-terminal domain, 2	Cited2	2.3	2.3	2.7
cyclin L1	Ccnl1	2.3	3	1.1
chemokine (C-C motif) ligand 3	Ccl3	2.3	2.3	3.3
RIKEN cDNA C230027N18 gene	C230027N18Rik	2.3	2.4	1.8
AT rich interactive domain 5B (Mrf1 like)	Arid5b	2.3	2.1	2
RIKEN cDNA 4631422O05 gene	4631422O05Rik	2.3	2.4	2.8
ring finger and FYVE like domain containing protein	Rffl	2.2	1.9	1
CASP8 and FADD-like apoptosis regulator	Cflar	2.2	2.2	2.8
chemokine (C-C motif) ligand 4	Ccl4	2.2	2.4	3.8
Rho guanine nucleotide exchange factor (GEF) 3	Arhgef3	2.2	1.7	2.8
TRAF family member-associated Nf-kappa B activator	Tank	2.1	2.6	2.1
nuclear factor of kappa light chain gene enhancer in B-cells inhibitor, alpha	Nfkbia	2.1	3.3	2.3
interleukin 1 receptor antagonist	Il1rn	2.1	1.2	2
growth arrest and DNA-damage-inducible 45 gamma	Gadd45g	2.1	3.2	3
chemokine (C-X-C motif) ligand 2	Cxcl2	2.1	3.6	2.3
chemokine (C-C motif) ligand 12	Ccl12	2.1	1.1	5.6
syndecan 4	Sdc4	2	1.3	2
RAB20, member RAS oncogene family	Rab20	2	2.5	2
human immunodeficiency virus type I enhancer binding protein 1	Hivep1	2	1.8	1.4
cytoplasmic polyadenylation element binding protein 4	Cpeb4	2	1.8	1
CD86 antigen	Cd86	2	1.7	2.4
cDNA sequence BC006779	BC006779	2	1.3	3.2
Rho family GTPase 3	Rnd3	1.9	1.8	3.4
avian reticuloendotheliosis viral (v-rel) oncogene related B	Relb	1.9	2.1	1.9
protein phosphatase 1, regulatory subunit 10 /// hypothetical protein LOC545202	Ppp1r10 /// LOC545202	1.9	2.4	1
heparin-binding EGF-like growth factor	Hbegf	1.9	1.4	2.5
caspase 11, apoptosis-related cysteine peptidase	Casp11	1.9	2.1	3.7
RIKEN cDNA 2810474O19 gene	2810474O19Rik	1.9	1.4	1.7
cytokine inducible SH2-containing protein	Cish	1.8	1.4	3.3
expressed sequence AI607873	AI607873	1.8	1.8	2.1
RIKEN cDNA 1500041J02 gene	1500041J02Rik	1.8	1.9	1.1
nuclear factor of kappa light polypeptide gene enhancer in B-cells inhibitor, epsilon	Nfkbie	1.7	1.8	3.2
interleukin 10 receptor, alpha	Il10ra	1.7	1.6	2.1
TAF7 RNA polymerase II, TATA box binding protein (TBP)-associated factor	Taf7	1.6	1.9	1
spermatogenesis associated 5-like 1	Spata5l1	1.6	1.1	1.6
nuclear factor of kappa light chain gene enhancer in B-cells inhibitor, beta	Nfkbib	1.6	2.2	1.1
MARCKS-like 1	Marcksl1	1.6	1.6	2.9
immunoresponsive gene 1	Irg1	1.6	2.3	6.9
RIKEN cDNA E130014J05 gene	E130014J05Rik	1.6	2.1	1.2
RIKEN cDNA C330006P03 gene	C330006P03Rik	1.6	1.3	1.8
ADP-ribosylation factor-like 8	Arl8	1.6	1.4	1.8
non-catalytic region of tyrosine kinase adaptor protein 1	Nck1	1.5	1	1.2
IBR domain containing 3	Ibrdc3	1.5	1.9	2.5
RIKEN cDNA E330016A19 gene	E330016A19Rik	1.5	1.1	2.3
C-type lectin domain family 4, member e	Clec4e	1.5	1.5	2
A kinase (PRKA) anchor protein 13	Akap13	1.5	2.1	1.2
syntaxin 11	Stx11	1.4	1.7	2.8
G protein-coupled receptor 126	Gpr126	1.4	1.8	1.4
endothelial differentiation, lysophosphatidic acid G-protein-coupled receptor, 2	Edg2	1.4	2.2	1.5
V-abl Abelson murine leukemia viral oncogene 2 (arg, Abelson-related gene) (Abl2), mRNA	Abl2	1.4	2	2
thyroid hormone receptor associated protein 1	Thrap1	1.3	1.9	1.5
Rap guanine nucleotide exchange factor (GEF) 2	Rapgef2	1.3	1.6	2.2
ral guanine nucleotide dissociation stimulator	Ralgds	1.3	1.3	2.5
prostaglandin E receptor 4 (subtype EP4)	Ptger4	1.3	1.1	1.5
pellino 1	Peli1	1.3	1.3	3
nuclear factor of kappa light polypeptide gene enhancer in B-cells 2, p49/p100	Nfkb2	1.3	1.2	1.3
nuclear factor, interleukin 3, regulated	Nfil3	1.3	2.1	4.5
DnaJ (Hsp40) homolog, subfamily A, member 2, mRNA (cDNA clone MGC:6445 IMAGE:2582183)	Dnaja2	1.3	2.1	2.4
baculoviral IAP repeat-containing 3	Birc3	1.3	2	2.3
B-cell leukemia/lymphoma 3	Bcl3	1.3	1.2	1.7
ring finger protein 2	Rnf2	1.2	1.7	1.6
rhomboid, veinlet-like 6 (Drosophila)	Rhbdl6	1.2	1.4	2.1
EST C78513	C78513	1.2	1.4	4.1
PREDICTED: hypothetical protein LOC57867 [Mus musculus], mRNA sequence	AA407452	1.2	1.3	3.1
RIKEN cDNA A630072M18 gene	A630072M18Rik	1.2	1.1	4
zinc finger protein 62	Zfp62	1.1	1.1	1.1
toll-like receptor 2	Tlr2	1.1	1.7	2.3
TCDD-inducible poly(ADP-ribose) polymerase	Tiparp	1.1	1.4	3.3
interferon activated gene 203 /// similar to interferon-inducible protein 203	Ifi203 /// LOC547362	1.1	1.6	2.9
Chromodomain helicase DNA binding protein 7 (Chd7), mRNA	Chd7	1.1	2.1	1.1
bromodomain containing 2	Brd2	1.1	1.3	1.2
BMP and activin membrane-bound inhibitor, pseudogene (Xenopus laevis)	Bambi-ps1	1.1	1.7	1.6
RIKEN cDNA 2510010F15 gene	2510010F15Rik	1.1	1.6	1.1
trichorhinophalangeal syndrome I (human)	Trps1	1	1.1	1.3
speedy homolog 1 (Drosophila)	Spdy1	1	1.4	1.5
sirtuin 1 ((silent mating type information regulation 2, homolog) 1 (S. cerevisiae)	Sirt1	1	1.8	1.9
rosbin, round spermatid basic protein 1	Rsbn1	1	2.5	1
jumonji, AT rich interactive domain 2	Jarid2	1	1.7	2.2
G protein-coupled receptor 84	Gpr84	1	1.2	2.4
G protein-coupled receptor 132	Gpr132	1	2.6	1
frizzled homolog 7 (Drosophila)	Fzd7	1	1.7	1
expressed sequence AA536808	AA536808	1	1.9	2
sestrin 1	Sesn1	-1	-2.1	-1.3
Junction-mediating and regulatory protein, mRNA (cDNA clone IMAGE:3991085)	Jmy	-1	-1.1	-1.1
interferon regulatory factor 2 binding protein 2	Irf2bp2	-1	-1.2	-2.7
FYN binding protein (Fyb), mRNA	Fyb	-1	-1.4	-1.2
RIKEN cDNA 9030425P06 gene	9030425P06Rik	-1	-1.3	1.2
RIKEN cDNA 4933439C20 gene	4933439C20Rik	-1	-1.4	-1
protein phosphatase 2C, magnesium dependent, catalytic subunit	Ppm2c	-1.1	-1.2	-1.4
Max dimerization protein 4, mRNA (cDNA clone MGC:19425 IMAGE:3490469)	Mxd4	-1.1	-1.1	-1.4
avian musculoaponeurotic fibrosarcoma (v-maf) AS42 oncogene homolog	Maf	-1.1	-1.4	-1.2
RIKEN cDNA 5930418K15 gene (5930418K15Rik), mRNA	5930418K15Rik	-1.1	-1.1	-1
Squalene epoxidase (Sqle), mRNA	Sqle	-1.2	-1.1	-1.8
tumor necrosis factor, alpha-induced protein 8-like 2	Tnfaip8l2	-1.2	-1.7	-1
meteorin, glial cell differentiation regulator-like	Metrnl	-1.2	-1.2	-1.1
cDNA sequence BC055757	BC055757	-1.2	-1.4	-1.2
RIKEN cDNA 1810034K20 gene	1810034K20Rik	-1.2	-1.2	-1.6
zinc finger CCCH-type containing 12D	Zc3h12d	-1.4	-1.7	-1.1
RAB3A interacting protein (rabin3)-like 1	Rab3il1	-1.4	-1.2	-1.4
nischarin	Nisch	-1.4	-1.3	-1
potassium channel tetramerisation domain containing 12b	Kctd12b	-1.4	-2	-1.8
Serine (or cysteine) peptidase inhibitor, clade B, member 6a, mRNA (cDNA clone MGC:6042 IMAGE:3481963)	Serpinb6a	-1.6	-1.6	-2.7
solute carrier family 40 (iron-regulated transporter), member 1	Slc40a1	-2.1	-1.9	-1.6
RIKEN cDNA 2410005O16 gene, mRNA (cDNA clone MGC:35752 IMAGE:4023319)	2410005O16Rik	-2.3	-2.3	-1.6
